# Supplementary material
Source: publisher figshare collection journal article supplement (https://acs.figshare.com/ndownloader/files/3891640)
Supplement: Supplementary file 1 [file 3891640]

## Supporting Information

### **Luminescent and transparent nanopaper based on rare-earth up-converting nanoparticles grafted nanofibrillated cellulose derived from garlic skin**

*Jingpeng Zhao<sup>†</sup>, Zuwu Wei<sup>†</sup>, Xin Feng<sup>\*,†</sup>, Miao Miao<sup>†</sup>, Lining Sun<sup>\*,†</sup>, Shaomei  
Cao<sup>†</sup>, Liyi Shi<sup>†,‡</sup>, Jianhui Fang<sup>‡</sup>*

<sup>†</sup> Research Center of Nano Science and Technology, Shanghai University, Shanghai  
200444, P. R. China.

<sup>‡</sup> Department of Chemistry, Shanghai University, Shanghai 200093, P. R. China.

\*Correspondence should be addressed to:

E-mail: [fengxin@shu.edu.cn](mailto:fengxin@shu.edu.cn) (X. Feng); [lnsun@shu.edu.cn](mailto:lnsun@shu.edu.cn) (L. N. Sun).

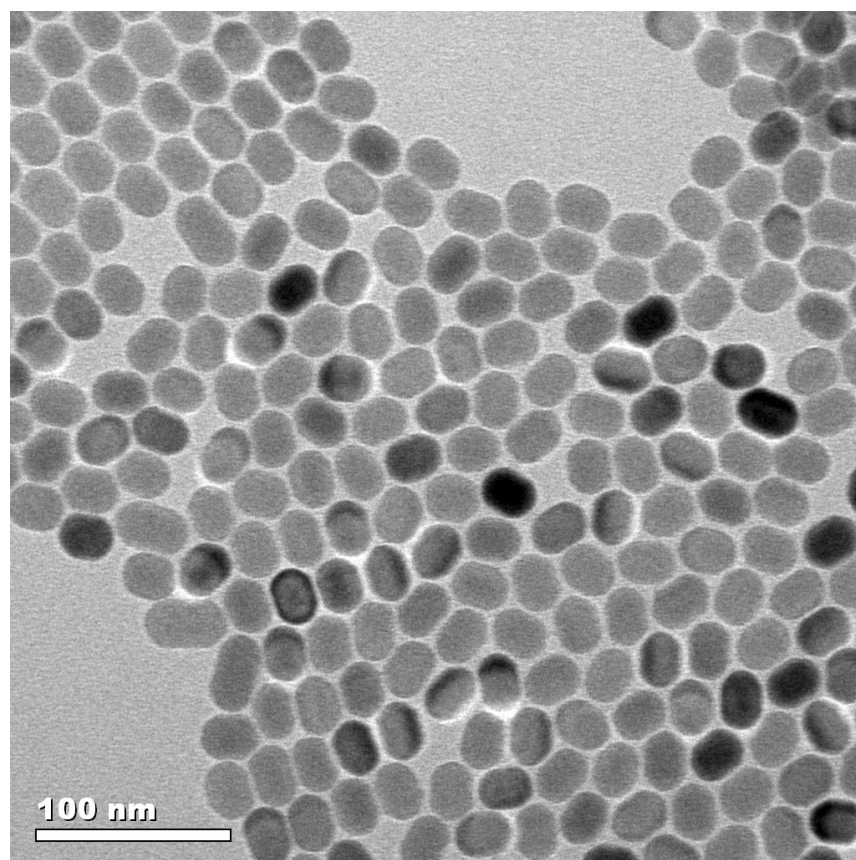

**Figure S1.** TEM image of as-prepared UCNPs.

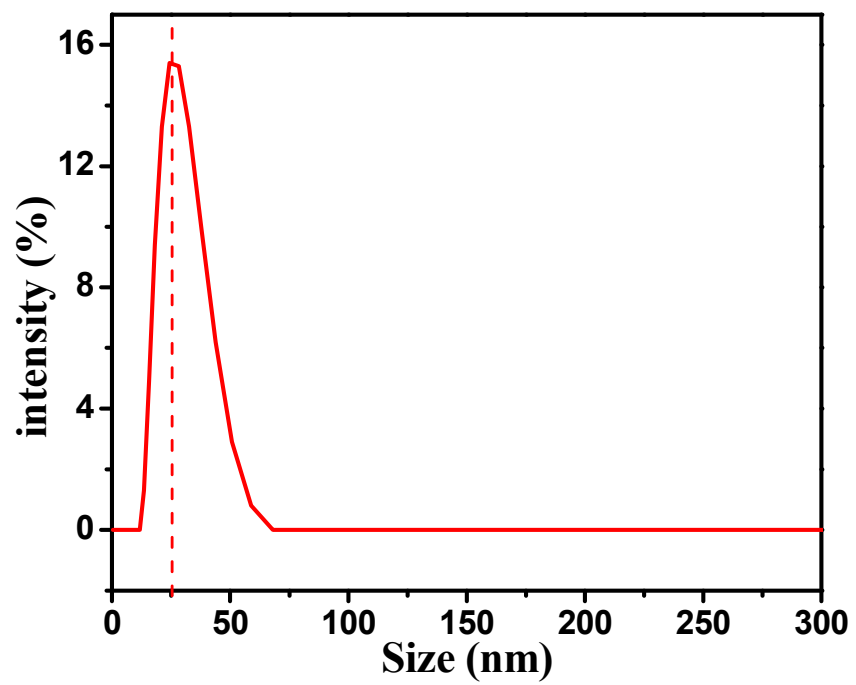

Figure S2. DLS measurement of the size distribution of UCNPs.

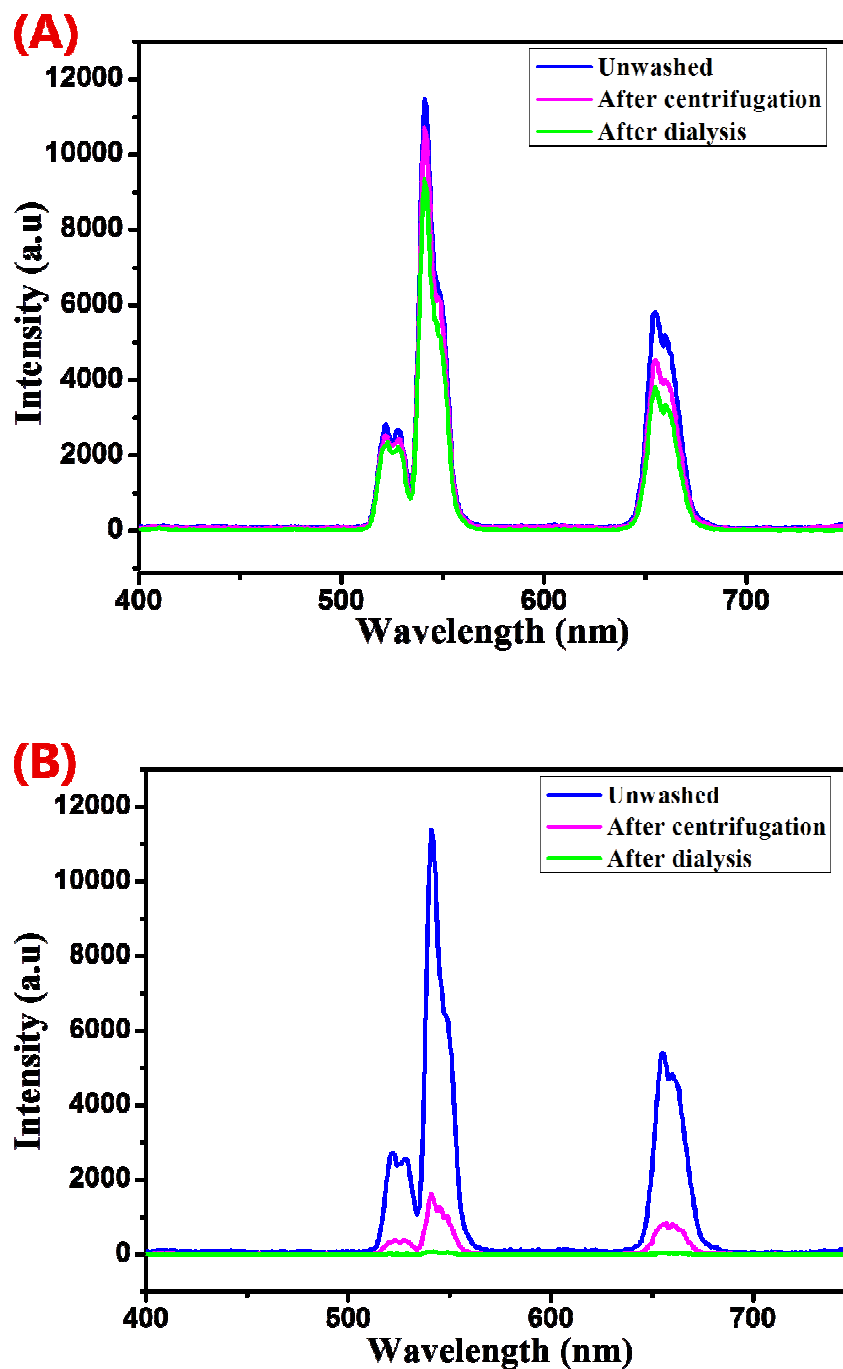

**Figure S3.** Up-conversion luminescence spectra of NFC-UCNPs with epoxidation reaction: unwashed, after centrifugation, after dialysis (A); Up-conversion luminescence spectra of NFC(UCNPs) without epoxidation reaction: unwashed, after centrifugation, after dialysis (B).

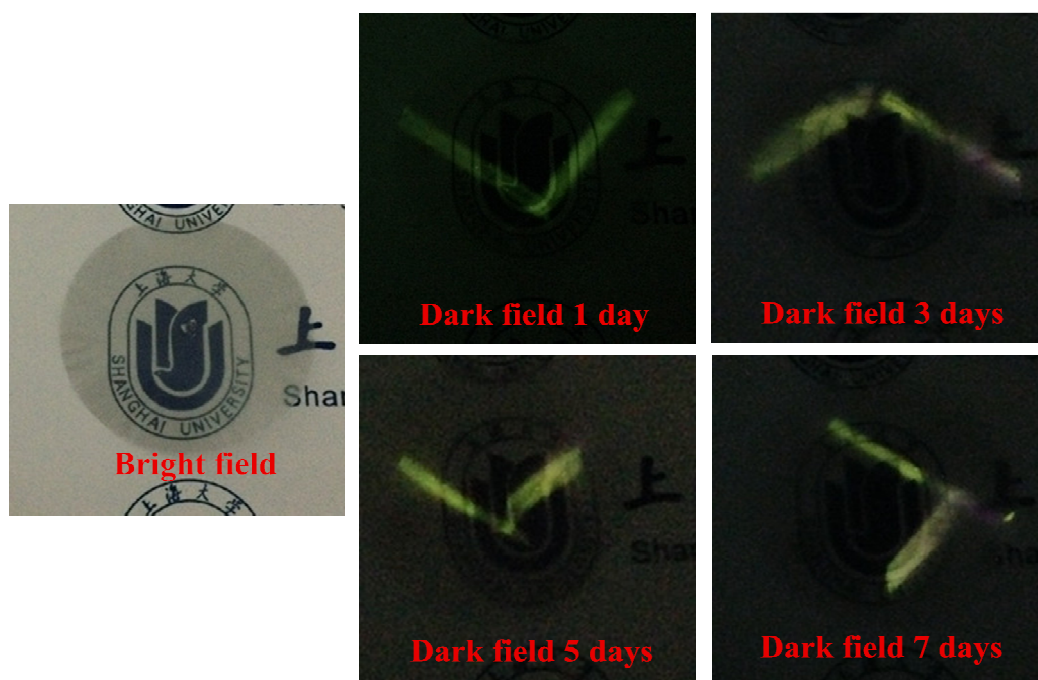

**Figure S4.** Picture of NFC-UCNPs nanopaper in the bright field and pictures of NFC-UCNPs nanopaper under excitation of 980 nm light with a power of 2 W after being soaked in the water for 1 day, 3 days, 5 days, 7 days, respectively.
